# Supplementary material for: Photoelectrocatalytic degradation of organic pollutants via a CdS quantum dots enhanced TiO2 nanotube array electrode under visible light irradiation
Source: Royal Society of Chemistry journal article supplement (doi:10.1039/c3nr34253k), 2013-01-01
Supplement: c3nr34253k.pdf [file c3nr34253k.pdf]

## Supporting Information:

# Photoelectrocatalytic Degradation of Organic Pollutants via CdS Quantum Dots Enhanced TiO<sub>2</sub> Nanotube Arrays Electrode under Visible Light Irradiation

*Guisheng Li\**, *Ling Wu*, *Fang Li*, *Pengpeng Xu*, *Dieqing Zhang*, and *Hexing Li\**

The Education Ministry Key Lab of Resource Chemistry, Shanghai Key Laboratory of Rare Earth Functional Materials, Shanghai Normal University, Shanghai 200234, China. \* Address correspondence: Fax: +(86)21-64322272; Tel: +(86)21-64321673; E-mail: Liguisheng@shnu.edu.cn, hexing-li@shnu.edu.cn

(2 pages, 2 figures)

### Table of Contents

1. **Figure S-1. Figure S-1.** Electron dispersive X-ray spectroscopy of the as-prepared 30s-CdS/TNTs samples.
2. **Figure S-2.** HRTEM image of the as-prepared 30s-CdS/TNTs samples.

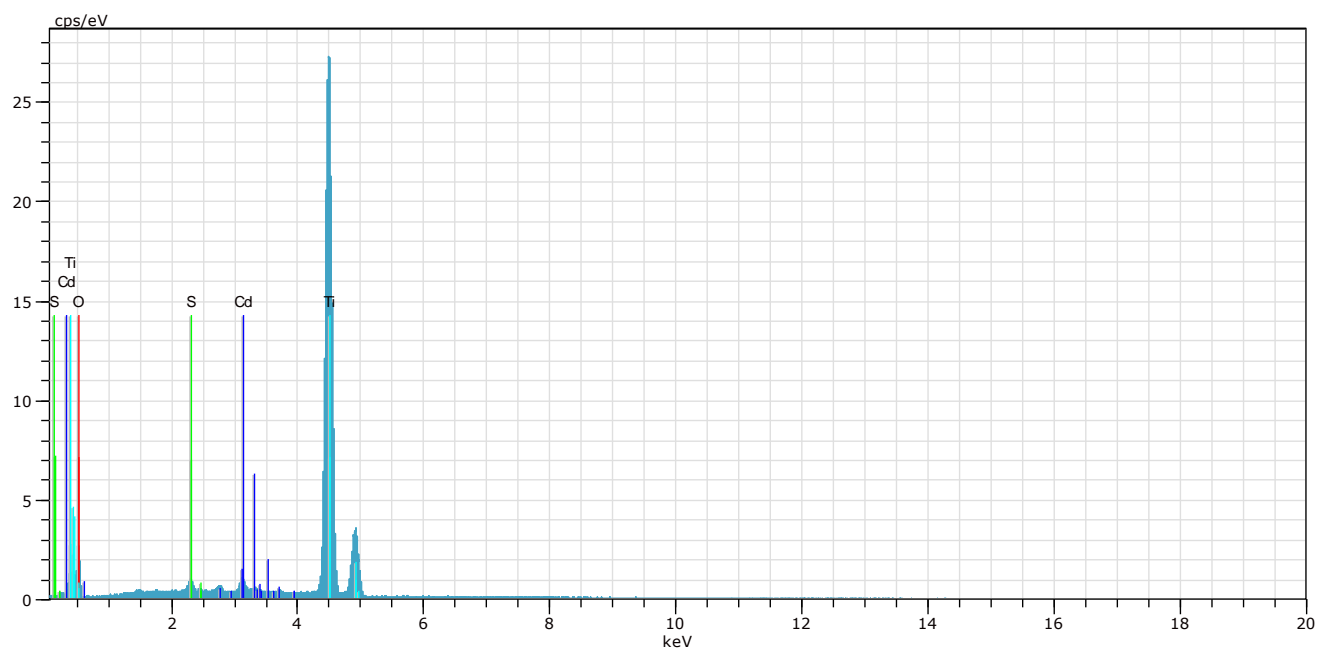

**Figure S-1.** Electron dispersive X-ray spectroscopy of the as-prepared 30s-CdS/TNTs samples.

2.

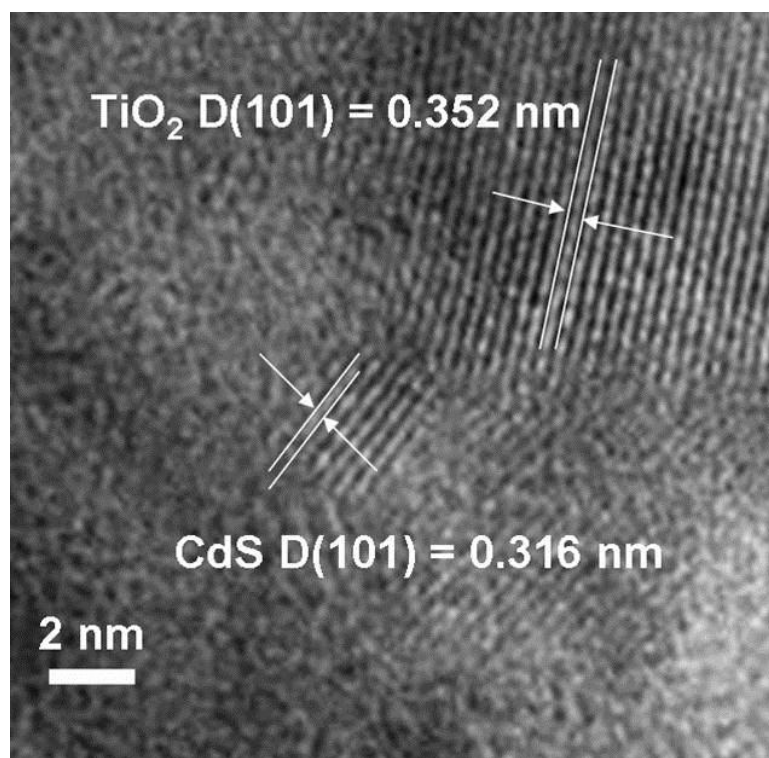

**Figure S-2.** HRTEM image of the as-prepared 30s-CdS/TNTs samples.
